1  
2  
3  
4  
5  
6  
7  
8  
9  
10  
11  
12  
13  
14  
15  
16  
17  
18  
19  
20  
21  
22  
23  
24

# Predicting evolutionary change at the DNA level in a natural *Mimulus* population

Patrick J. Monnahan<sup>1,2,3</sup>, Jack Colicchio<sup>1,3,4</sup>, Lila Fishman<sup>5</sup>, Stuart J. Macdonald<sup>6</sup>, and John K. Kelly<sup>1\*</sup>

<sup>1</sup>Department of Ecology and Evolutionary Biology, University of Kansas, Lawrence, KS, USA

<sup>2</sup>Current address: Department of Pediatrics, University of Minnesota, Minneapolis, MN 55455, USA

<sup>3</sup>Equal contribution

<sup>4</sup>Current address: Plant and Microbial Biology, University of California, Berkeley, CA, USA

<sup>5</sup>Division of Biological Sciences, University of Montana, Missoula, MT, USA

<sup>6</sup>Department of Molecular Biosciences, University of Kansas, Lawrence, KS, USA

\*Corresponding author: [jkk@ku.edu](mailto:jkk@ku.edu)

## 25 Abstract

26 Evolution by natural selection occurs when the frequencies of genetic variants change because  
27 individuals differ in Darwinian fitness components such as survival or reproductive success.  
28 Differential fitness has been demonstrated in field studies of many organisms, but our ability to  
29 quantitatively predict allele frequency changes from fitness measurements remains unclear.  
30 Here, we characterize natural selection on millions of Single Nucleotide Polymorphisms (SNPs)  
31 across the genome of the annual plant *Mimulus guttatus*. We use fitness estimates to calibrate  
32 population genetic models that effectively predict observed allele frequency changes into the  
33 next generation. Hundreds of SNPs experienced “male selection” in 2013 with one allele at each  
34 SNP elevated in frequency among successful male gametes relative to the entire population of  
35 adults. In the following generation, allele frequencies at these SNPs consistently shifted in the  
36 predicted direction. A second year of study revealed that SNPs had effects on both viability and  
37 reproductive success with pervasive trade-offs between fitness components. SNPs favored by  
38 male selection were, on average, detrimental to survival. These trade-offs (antagonistic  
39 pleiotropy and temporal fluctuations in fitness) may be essential to the long-term maintenance of  
40 alleles undergoing substantial changes from generation to generation. Despite the challenges of  
41 measuring selection in the wild, the strong correlation between predicted and observed allele  
42 frequency changes suggests that population genetic models have a much greater role to play in  
43 forward-time prediction of evolutionary change.

44

45

## 46 Author summary

47 For the last 100 years, population geneticists have been deriving equations for  $\Delta p$ , the change in  
48 allele frequency owing to mutation, selection, migration, and genetic drift. Seldom are these  
49 equations used directly, to match a prediction for  $\Delta p$  to an observation of  $\Delta p$ . Here, we apply  
50 genomic sequencing technologies to samples from natural populations, obtaining millions of  
51 observations of  $\Delta p$ . We estimate natural selection on SNPs in a natural population of yellow  
52 monkeyflowers and find extensive evidence for selection through differential male success. We  
53 use the SNP-specific fitness estimates to calibrate a population genetic model that predicts  
54 observed  $\Delta p$  into the next generation. We find that when male selection favored one nucleotide  
55 at a SNP, that nucleotide increased in frequency in the next generation. Since neither observed  
56 nor predicted  $\Delta p$  are generally large in magnitude, we developed a novel method called  
57 “haplotype matching” to improve prediction accuracy. The method leverages intensive whole  
58 genome sequencing of a reference panel (187 individuals) to infer sequence-specific selection in  
59 thousands of field individuals sequenced at much lower coverage. This method proved essential  
60 to accurately predicting  $\Delta p$  in this experiment and further development may facilitate population  
61 genetic prediction more generally.

62

## 63 Introduction

64

65 Natural selection is routinely strong enough to measure within natural populations. Classic  
66 experiments on conspicuous polymorphisms were the first to demonstrate fitness differences  
67 among genotypes [1, 2]. Field experiments later demonstrated selection on allozymes [3] and  
68 structural variants such as inversions [4-6], but quantitative trait locus (QTL) mapping greatly  
69 expanded the set of loci amenable to direct study [7]. The link that QTLs provide to phenotype  
70 can enable a “mechanistic” understanding of selection, allowing us to describe the processes that  
71 maintain polymorphism (e.g. antagonistic pleiotropy [4, 8], frequency dependent selection [9] or  
72 gametic/zygotic fitness trade-offs [10]), and the environmental drivers of selection (e.g.  
73 differential predation [11]). In aggregate, these single-locus studies have provided great insight  
74 on the contribution of major loci to the standing variance in fitness within natural populations.

75

76 Genome-wide surveys of natural populations deliver a comprehensive view of selection. An  
77 important question is how many loci across the genome experience selection in a typical  
78 generation. Sequencing of natural populations sampled through time suggests that the strong  
79 selection documented in single locus studies can occur at hundreds of polymorphisms  
80 simultaneously [12, 13]. In *Drosophila melanogaster*, large amplitude fluctuations in allele  
81 frequency occur seasonally and can be directly related to weather conditions [14]. The  
82 magnitude and consistency of changes, as well as the environmental correlation, clearly imply  
83 that selection (and not genetic drift) is causal. The temporal sampling method employed for *D.*  
84 *melanogaster* should be expanded to other systems in the future, but some questions require  
85 individual level genome sequence data. For instance, are fitness differences caused mainly by

86 differences in viability or fertility or mating success? Experiments predicting individual fitness  
87 from individual genomes have been conducted in a variety of organisms using both “common  
88 gardens,” where sequenced individuals are transplanted into natural settings [15-18], as well as  
89 monitoring of native individuals *in situ* [19-21]. These studies yield varying results on the  
90 importance of different selection components, but in aggregate, suggest that selection is a  
91 pervasive force on ecological time scales.

92

93 Here, we measure genome-wide selection and allele frequency change in a field study of  
94 *Mimulus guttatus*; a plant species in which the various methods described above have been  
95 applied extensively within a single natural population at Iron Mountain (IM). We have  
96 demonstrated strong fitness effects of segregating inversions by genotyping IM plants that were  
97 also scored for fecundity [22, 23]. Transplant experiments using QTL constructs for ecologically  
98 important traits have confirmed that conflicting selection pressures are key to the maintenance of  
99 variation [24, 25]. QTL alleles that increase plant size at reproduction nearly always delay  
100 flowering, which generates antagonistic pleiotropy between survival and fecundity. These  
101 single-locus experiments (QTLs and inversions) have been corroborated by Genome Wide  
102 Association (GWA) of traits and fitness components in IM [17]. ‘Big/slow’ alleles that delay  
103 progression to flowering, but increase flower size, segregate at many loci across the genome.  
104 They tend to be less frequent than their ‘small/fast’ alternatives within IM [17, 26], which is  
105 consistent with many years of field monitoring indicating that viability selection generally favors  
106 small/fast alleles [24, 25, 27]. However, the GWA also demonstrated temporal fluctuation in the  
107 net balance of fitness components [17] suggesting that year-to-year changes in water availability  
108 are key to the maintenance of variation.

109

110 The focus of this paper is prediction: Can we characterize selection at the SNP level accurately  
111 enough to predict allele frequency change into the next generation? Prospective (forward-time)  
112 prediction of evolutionary change from measurements of selection is a primary goal of  
113 quantitative genetics [28-32], but has long been considered beyond the scope of population  
114 genetics [33]. In quantitative genetics, estimates of phenotypic selection (differentials or  
115 gradients) can be combined with estimates of inheritance (heritability or genetic (co)variance) to  
116 predict the change in mean phenotypes [34, 35]. Prediction accuracy can be improved by  
117 directly relating the loci affecting a trait to fitness, using either the secondary theorem of  
118 selection [36, 37] or via genomic selection methods [38]. The scope of quantitative genetics is  
119 broad, but its enduring relevance to both agriculture [39, 40] and evolutionary biology [29] owes  
120 importantly to its capacity for prospective prediction. It is an open question whether selection on  
121 SNPs strong enough to predict  $\Delta p$ , the change in allele frequency, in a manner analogous to  $\Delta \bar{z}$ ,  
122 the change in mean phenotype.

123

124 To estimate selection on SNPs, we collected paired-end sequence reads from reduced  
125 representation [41] sequencing libraries of 1936 experimental plants (field individuals and  
126 progeny). We called variants within reads and aligned them to 187 full genome sequences  
127 previously obtained from the IM population [17]. This alignment is the basis for the “haplotype  
128 matching” technique of genotype inference. Below, we describe this technique and then provide  
129 a proof-of-concept application to data from the *Drosophila* Synthetic Population Resource  
130 (DSPR) [42] where haplotype inheritance is known. We then apply haplotype matching to  
131 derive genotype probabilities for SNPs within 15,360 genic regions of experimental plants.  
132 These likelihoods are inputs to the selection component models that predict allele frequency

133 change [19, 43]. Male selection is measured by synthesizing maternal and progeny sequencing  
 134 to infer the (unseen) male siring fitness component. We show that male selection in 2013  
 135 predicts observed changes in allele frequency into the next generation; the latter estimated from a  
 136 distinct sampling of plants in 2014.

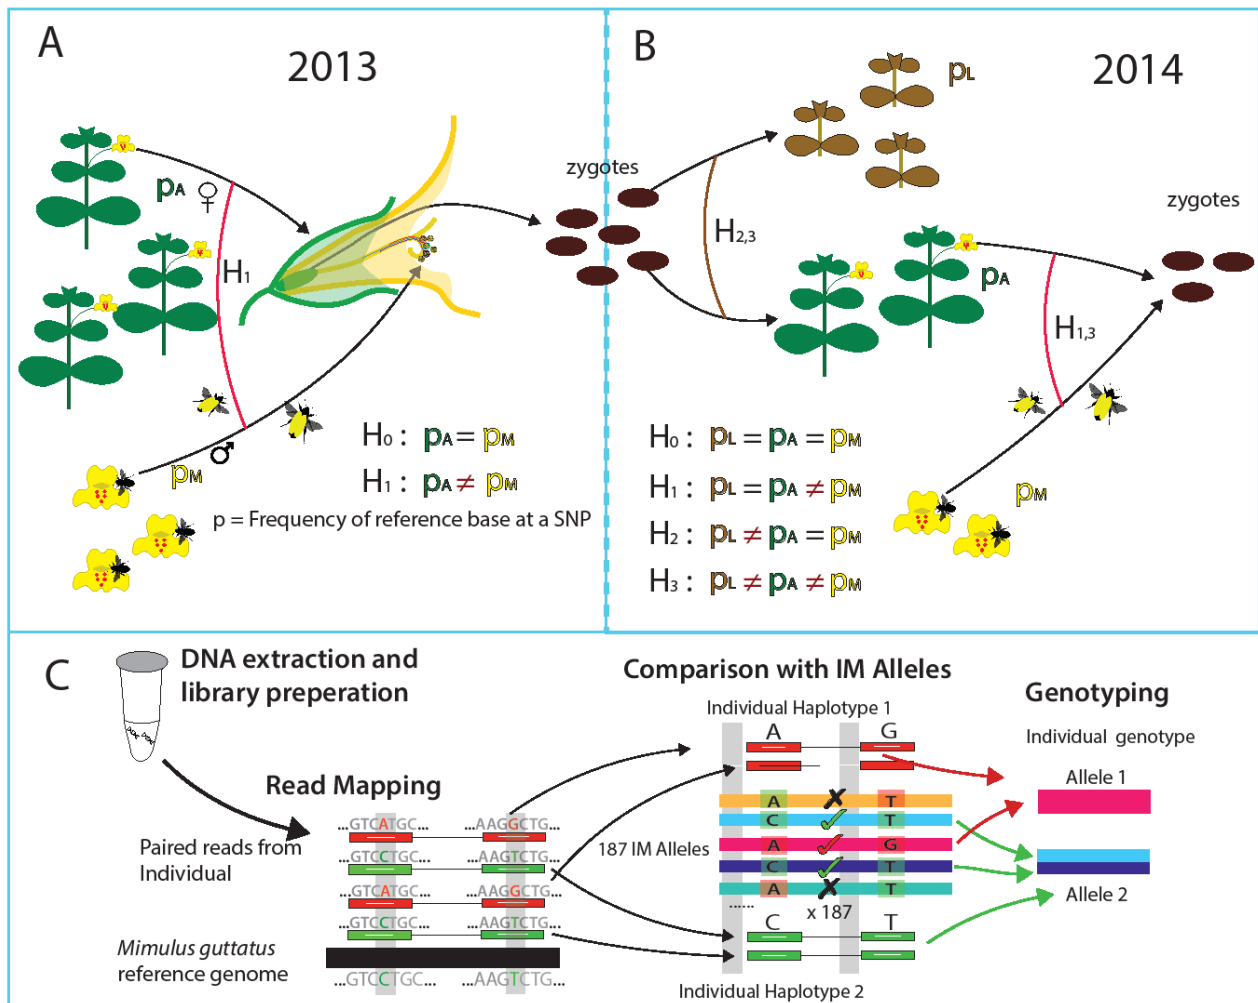

137

138 **Figure 1. The parameters of alternative selection models are depicted for the (A) 2013 and (B) 2014**  
 139 **data. Hypothesis tests are expressed in terms of parameter constraints where  $p$  indicates reference**  
 140 **base frequency:  $p_A$  for reproductive adults,  $p_M$  for successful male gametes, and  $p_L$  plants for**  
 141 **plants that fail to reproduce.  $H_0$  is the full neutral model. Male selection is tested by contrast of  $H_1$**   
 142 **to  $H_0$  in 2013 and  $H_3$  to  $H_1$  in 2014. Viability selection is tested by contrast of  $H_3$  to  $H_2$ . (C) After**  
 143 **DNA sequencing, read-pairs are mapped to the *M. guttatus* reference genome. The haplotype**  
 144 **matching method (read-pairs to genic-haplotypes) is illustrated for a simple case with read-pairs**  
 145 **mapping to single location. Read-pairs impose a probabilistic ‘process of elimination’ on reference**  
 146 **line sequences as putative ancestors:  $\checkmark$  indicates consistency and “X” inconsistency.**

147

148

## 149 Results and Discussion

150 *Mimulus guttatus* (syn. *Erythranthe guttata*) is a hermaphroditic species that can experience  
151 selection prior to flowering, via differential viability, and subsequent to flowering through both  
152 male and female function. In the first year of our study (Fig 1A: 2013), we sampled plants that  
153 successfully flowered (adults), genotyping them as well as a random collection of their progeny.  
154 Given the maternal genotype, we can statistically identify her allelic contribution to offspring  
155 and distinguish allele frequency among all adults ( $p_A$ ) from that in the population of *successful*  
156 male gametes ( $p_M$ ). The  $p_A/p_M$  test evaluates whether these frequencies are different and thus  
157 identifies selection through differential male success. “Male selection” integrates a number of  
158 distinct selective mechanisms [19] including simple differences in fecundity (which may be  
159 equivalent between male and female function), sexual selection through differential siring [44]  
160 and pollen competition [45].

161

162 To test the predicted changes caused by male selection in 2013, we sampled plants from the next  
163 generation (Fig. 1B: 2014). We used MSG-RADseq [41] reduced representation sequencing to  
164 genotype three distinct cohorts: individuals that germinated but failed to reproduce (allele  
165 frequency  $p_L$ ), individuals that successfully flowered and produced fruit (allele frequency  $p_A$ ),  
166 and a random sample of progeny from reproductive individuals (used to estimate  $p_M$ ). We  
167 performed statistical contrasts between cohorts, asking whether allele frequency differs using  
168 likelihood based selection component models [43, 46-48] generalized to accommodate uncertain  
169 genotype calls [19]. Selection is indicated when a model that allows allele frequencies to differ

170 between cohorts, e.g.  $p_A \neq p_M$ , has a much higher likelihood than a constrained model, e.g.  
171  $p_A = p_M$  (see METHODS section D).

172

173 We derived SNP allele frequency estimates using a two-stage genotyping strategy (Fig 1C).

174 Read-pairs are initially matched to the set of ‘genic haplotypes’ present in IM. Sequence

175 variation is very high in *M. guttatus* [49] and it is difficult to effectively call variants outside

176 genic regions. We thus established “gene sets” as loci. A set is either a single gene or a

177 collection of closely linked (within 100bp) and/or overlapping genes (Supplemental Table S1).

178 The genic haplotypes are the sequences for this locus among the reference panel genomes

179 (detailed procedures in Supplemental Appendix B). With 187 distinct haplotypes, there are

180 17,578 distinct genic-genotypes. However, most gene sets have fewer than 187 because some

181 IM lines are identical within a gene set (the median number of distinct genic-haplotypes is 100,

182 Supplemental Table S1).

183

184 We treat the genic haplotypes as the sequences present in the natural population (Fig 1C). Let

185  $U_{[plantID],i,j}$  denote the likelihood for the full collection of read-pairs from a plant given that its

186 diploid genic-genotype is  $[i,j]$ , where  $i$  and  $j$  index genic haplotypes. For an outbred plant,

188 
$$U_{[plantID],i,j} = \prod_{r=1}^{RP} \left( \frac{\epsilon^{h_{r,i}}}{2} + \frac{\epsilon^{h_{r,j}}}{2} \right)$$

187 (1)

189 where RP is the number of read-pairs mapped in this gene set,  $h_{r,i}$  is the number of sequence

190 mismatches between read-pair  $r$  and genic haplotype  $i$ , and  $\epsilon$  is the mismatch probability.  $\epsilon$

191 aggregates the various events (sequencing error, alignment error, etc) that could create an



192 apparent sequence difference even if the read-pair and haplotype are the same.  $U$  relates the  
193 RADseq data collected from field plants to the tests for selection.

194

195 A potential difficulty with haplotype matching is that the sequence of a field plant may not match  
196 any of our genic haplotypes; an error that could reduce our ability to detect selection. It is  
197 straightforward to test whether individual read-pairs are consistent with the genic haplotypes.

198 Across the 99 million read-pairs in the final RADseq dataset (field plants from both years), the  
199 median number of SNPs per read-pair is 6. About 20% of read-pairs overlap 10 or more SNPs  
200 (Supplemental Table S2, Supplemental Figure S1). Across all read-pairs, less than 0.2% failed  
201 to perfectly match at least one genic haplotype. Of course, the full collection of read-pairs from  
202 a plant can still be inconsistent with any pair of genic haplotypes (even if all individual read-  
203 pairs map perfectly). This occurs, but very infrequently. In these cases, the genotype is treated  
204 as unknown. The consequences of incomplete sampling of the reference panel are explored in a  
205 companion paper [50].

206

207 Given consistency, the question becomes how precisely low-level sequencing can identify the  
208 genotype of field plants. As expected, the number of possible genic genotypes for a plant  
209 declines as the number of read-pairs mapped to gene set increases (Fig 2A). With low but  
210 reasonable coverage (10-20 read-pairs over an entire gene), the collection of compatible genic-  
211 genotypes is greatly reduced (on average to  $\approx 5\%$  of the total). Oftentimes, we identify one  
212 parental genic-haplotype definitively, but the other is consistent with multiple sequences from  
213 the reference set (illustrated by Fig 1C). The aggregation of evidence across numerous read-pair  
214 loci (mapping to different parts of gene) is usually needed to identify specific genic-haplotypes.

215 While zeroing in on 5% of diploid genic-genotypes is still hundreds of possibilities, these  
216 possibilities often strongly “agree” about the genotype at particular SNPs – all or nearly all  
217 genic-genotypes have the same genotype at that SNP. SNP specific inference can be quite strong  
218 even with moderate coverage. Plants with low sequencing coverage often have few or no read-  
219 pairs, particularly in smaller gene sets. In isolation, inference for such plants would be weak.  
220 Here, inference can become much stronger with information from relatives (the maternal plant,  
221 siblings, or offspring). Importantly, we never truncate probabilities to produce “hard calls” for  
222 SNPs. Uncertainty is propagated through the entire analysis and thus properly integrated in  
223 testing. The selection analyses cycle through all SNPs within a gene set, considering each as a  
224 potential effector of fitness.

225

### 226 **A test of haplotype matching using *Drosophila melanogaster***

227 With the *Mimulus* data, we do not know the true genic-genotype of field plants and thus cannot  
228 compare inferred to known. For this reason, we applied our pipeline to a *Drosophila*  
229 *melanogaster* population where genic-genotypes are known with high confidence. The  
230 *Drosophila* Synthetic Population Resource (DSPR) consists of two multiparental, advanced  
231 generation intercross Recombinant Inbred Line (RIL) populations, each initiated from eight  
232 inbred founder strains [42, 51]. The founder strains have been fully sequenced and represent the  
233 reference panel in the current context. The RILs (comparable to *Mimulus* field plants) were  
234 genotyped and we know the founder strain that contributed the allele at each gene of each RIL.  
235 Some regions in some RILs are not genotyped with certainty, but we exclude these from our  
236 analyses.

237

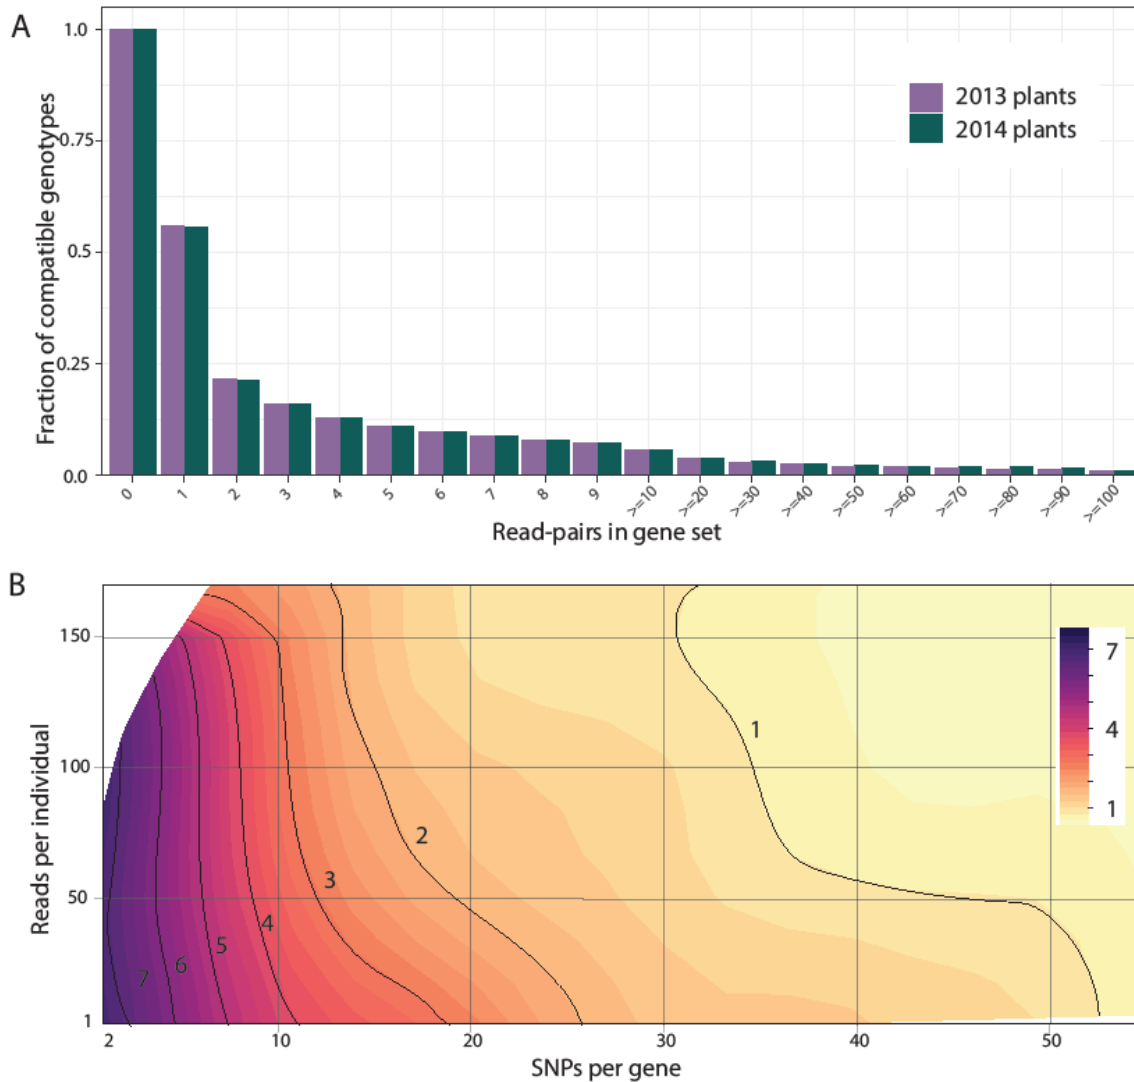

238

239 **Figure 2. Testing haplotype matching: (A) In *Mimulus*, the precision of estimation is depicted as a**  
240 **function of the amount of data per plant. Compatible means that the likelihood for a genic-**  
241 **genotype is within 50% of the most likely genotype. (B) In *Drosophila*, the number of ancestors**  
242 **(indicated by contours and color) matching the genotype of a particular RIL is depicted as a**  
243 **function of amount of data (reads) and the number of SNPs in the gene set.**

244

245 We collected MSG-RADseq data on 60 of the RILs from DSPR using the same methods as for  
246 *Mimulus*, except that the *Drosophila* sequences are 94bp single end reads instead of the PE100.  
247 We processed the *D. melanogaster* reference genome into ‘gene sets’ and then implemented the  
248 same *Mimulus* pipeline for read mapping, SNP calling and haplotype matching. The great

249 majority of *D. melanogaster* reads overlap 3 or fewer SNPs and are thus less informative than  
250 the *Mimulus* read-pairs (Supplemental Figure S1). Finally, we compared the inferred genotype  
251 to the “known” ancestry of each RIL as a test of the method.

252

253 This exercise confirms the validity of the haplotype matching, but also its limitations. The  
254 ancestral line (or lines) deemed most likely by haplotype matching includes the “correct” line  
255  $\approx 99.5\%$  of the time. We assigned the ancestral genotype as “known” if the posterior probability  
256 was greater than 0.99 [42, 51] and thus a small rate of mismatch (less than 1%) is expected even  
257 if haplotype matching is perfect. The 99.5% obtained by haplotype matching of MSG data is  
258 thus actually close to the theoretical upper limit for accuracy. However, while haplotype  
259 matching is accurate, it is not always precise. Oftentimes, the method predicts that numerous  
260 genic-genotypes are equally likely. Inference to the specific correct ancestor increases in a  
261 predictable fashion with the number of SNPs per gene set and number of reads scored for that  
262 line (Fig 2B).

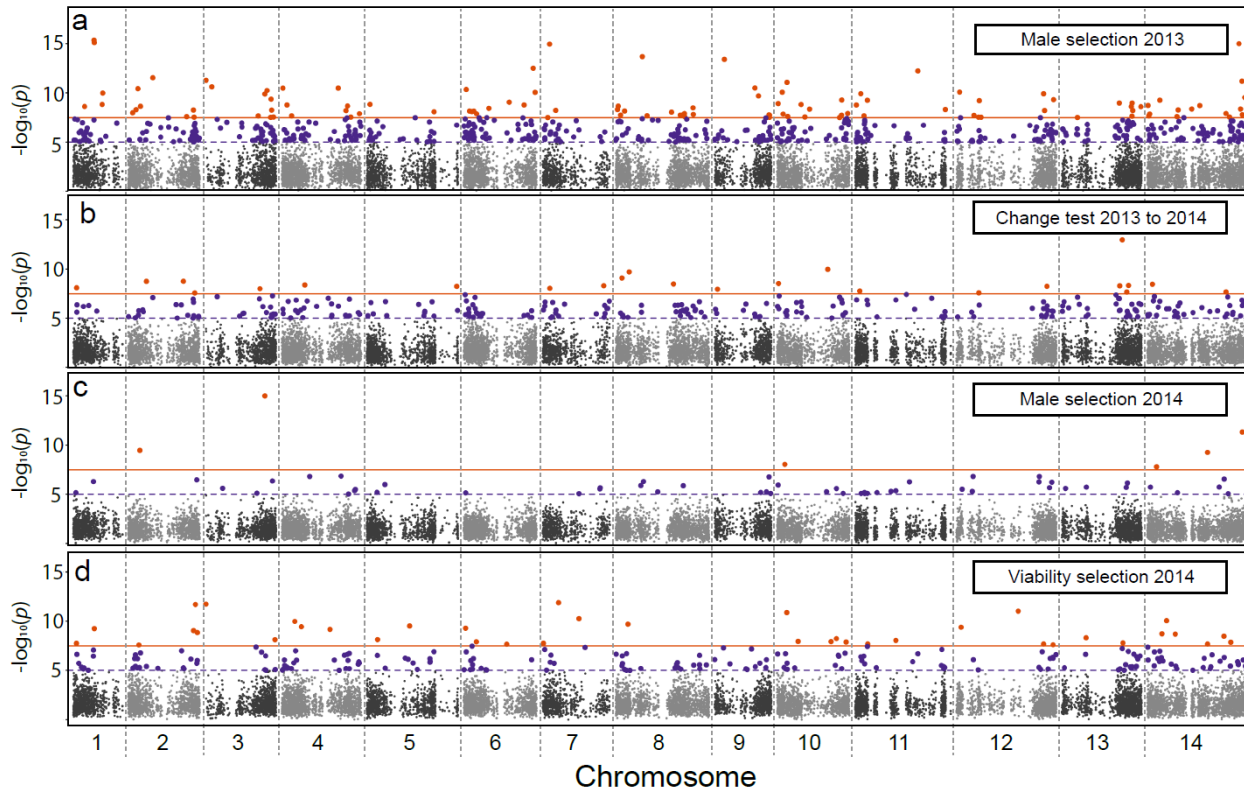

263

264 **Figure 3. Manhattan plots, with a single test reported per gene, for (a) Male selection 2013, (b)**  
265 **Allele frequency change 2013-2014, (c) Male selection 2014, and (d) Viability selection 2014. The**  
266 **orange line is the Bonferroni threshold, purple is  $p = 10^{-5}$ .**

267

268

### 269 **Male selection in 2013 predicts change into 2014**

270

271 We implemented haplotype matching on the *Mimulus* data and tested 1,523,410 SNPs for  
272 selection (filters described in METHODS section B). Testing outcomes within genes were  
273 highly correlated owing to linkage disequilibria, and for this reason, we focus on a single test per  
274 gene set for the various analyses described below (15,360 tests). Considering the most significant  
275 SNP per gene (Supplemental Table S0), 112 tests were genome-wide significant for  $p_A/p_M$  in  
276 2013 (Fig. 3A; Bonferroni  $\alpha = 0.05/1523410$ ). Given that Bonferroni is excessively  
277 conservative, we conducted follow-up analyses accepting SNPs (at most one per gene set) with  $p$

278  $< 10^{-5}$  (587 SNPs in Fig 3A). More false positives (SNPs not under selection) are included with  
279 a more permissive threshold, but such SNPs will diminish signal making subsequent tests  
280 conservative.

281

282 We next performed a test for allele frequency change from 2013 to 2014 by considering the data  
283 from both years simultaneously. We first fit a model where  $p_A$  in 2013 is constrained to equal  $p_Z$ ,  
284 the allele frequency in zygotes of 2014. We contrast that likelihood to a more general model  
285 where  $p_Z$  is unconstrained, its value determined entirely by data from 2014. Rejecting  $p_{A13} =$   
286  $p_{Z14}$  for a SNP indicates allele frequency change into the next generation. Applying this test, we  
287 find that 24 genes pass the Bonferroni threshold and that 274 gene sets have at least one SNP  
288 with  $p < 10^{-5}$  (Fig. 3B). The broad distribution of these tests across chromosomes suggests  
289 extensive allele frequency change in IM from 2013 to 2014.

290

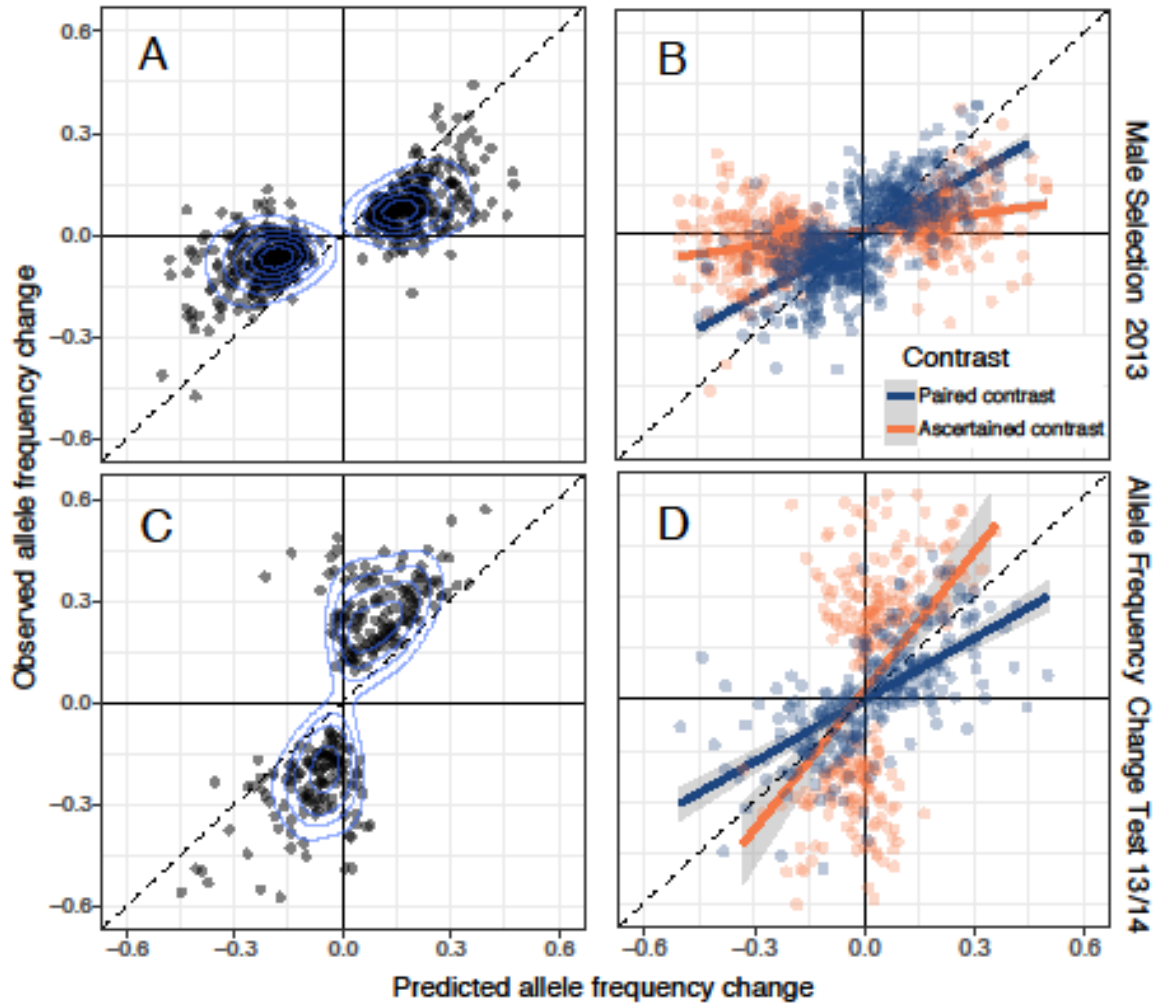

291

292 Figure 4. The observed allele frequency change (2013 adults to 2014 zygotes) is compared to predicted with  
293 SNPs chosen based on (A) evidence for male selection in 2013 ( $n = 587$ ) or (C) evidence of change in allele  
294 frequency ( $n=274$ ). Results are reported for all gene sets with a SNP with  $p < 10^{-5}$ . (B) In the cross-validation  
295 of SNPs selected based on male selection, the “Ascertained” contrast is based on the predicted  $\Delta p$  from the  
296 significant test (orange points) while the “Paired” contrast is based on the predicted  $\Delta p$  from the other half of  
297 the data (blue points). (D) In the cross-validation for allele frequency change significant tests, the ascertained  
298 (orange) is the observed  $\Delta p$  from the significant test and predicted  $\Delta p$  from the other data half. Assignment is  
299 reversed because the allele frequency change test is based on the observed  $\Delta p$ . For cross-validation, we chose  
300 an equivalent number of SNPs to the un-partitioned analyses ( $n = 587$  in (B) to match (A) and  $n = 274$  in (D)  
301 to match (C)). Contours indicate the density of points in panels A,C.  
302

303 We obtain strongly positive relationships between predicted and observed allele frequency  
304 change from both the male selection and allele frequency change tests, respectively (Fig 4A:  $r =$   
305  $0.79$ , Fig 4B:  $r = 0.76$ ,  $p < 0.0001$  for both). Both tests imply that alleles elevated in the  
306 successful male pollen pool relative to the flowering adult population in 2013 tended to rise in

307 frequency in 2014. We first consider SNPs significant for male selection in 2013 (Fig. 3A) and  
308 contrast the predicted change,  $\Delta p = (p_M - p_A)/2$ , to the apparent  $\Delta p$  from 2013 adults to 2014  
309 zygotes (Fig. 4A). Second, we consider SNPs based on evidence for change between years (Fig.  
310 3B) and contrast the direction/magnitude of this observed change to that predicted by 2013 male  
311 selection (Fig. 4B). Each relationship deviates from 1:1 (the naïve expectation with unbiased  
312 prediction) with the slope for male selection SNPs less than 1 (A: 0.40) and the slope for allele  
313 frequency change SNPs greater than 1 (B: 1.57).

314

315 The evident positive associations between observed and predicted  $\Delta p$  are very encouraging.  
316 However, these relationships require careful statistical scrutiny. The data (and thus estimates)  
317 from 2013 and 2014 are statistically independent, but the x- and y-axis  $\Delta p$  values in Fig 4A,C  
318 share a parameter ( $p_A$  in 2013) that contributes negatively to the  $\Delta p$  estimates on each axis. As a  
319 consequence, estimation error in  $p_A$  will generate a positive covariance between observed and  
320 predicted *apart from that generated by correct prediction*. Ascertainment is second factor.  
321 Choosing the most significant SNP for male selection in 2013 will select for those with  
322 exaggerated estimates of  $(p_M - p_A)$ . When male selection favors the reference base, the most  
323 significant tests will have positive estimation error added to the true positive value of  $(p_M - p_A)$ ,  
324 and the reverse is true for SNPs where the alternative base is favored. The so called “winner’s  
325 curse” [52, 53] will thus reduce the regression slope relative to 1 in Fig 4A because the allele  
326 frequency in 2014 zygotes is unaffected by estimation error in the previous generation.  
327 Ascertainment tends to exaggerate the y-axis variable for the allele frequency change test  
328 inflating the slope relative to one. The regression slopes in Fig 4A,C (observed onto predicted)  
329 deviate from 1:1 as predicted by this ascertainment effect.



330

331 We conducted two analyses that establish genuine prediction of  $\Delta p$  in the face of these errors and  
332 biases. First, we used ‘cross-validation’ by splitting the 2013 experiment into odd numbered and  
333 even numbered families, respectively. We then performed model fits on each half separately,  
334 generating two distinct pairs of observed and predicted  $\Delta p$  for each SNP. We then matched the  
335 “odd” predicted  $\Delta p$  to the “even” observed  $\Delta p$ , and vice versa. With this procedure, there is no  
336 correlation between observed and predicted in the absence of prediction (Supplemental  
337 Appendix D). The partitioning of points in Fig 4B,D reflects the ascertainment step where we  
338 choose tests only if male selection (4B) or allele frequency change (4D) was significant. There  
339 are two distinct contrasts for a significant SNP. The first is the significant test  $\Delta p$  (say Odd)  
340 matched to the observed  $\Delta p$  from the other data half (even), which we denote the “Ascertained  
341 contrast.” The remaining data from this SNP (predicted from even, observed from odd in this  
342 example) is the “Paired contrast.”

343

344 The split data produce strong positive relationships between observed and predicted  $\Delta p$  for both  
345 Ascertained and Paired contrasts (Fig 4B,D) despite the reduction in power caused by halving  
346 the data. For male selection (Fig 4B), correlations between predicted and observed would be  
347 zero for both Paired and Ascertained if SNPs were neutral (or prediction unrelated to response at  
348 non-neutral SNPs). In fact, both correlations are highly significant ( $p < 0.00001$  for each in Fig  
349 4B). It is noteworthy that the regression slope is greater for the Paired contrasts (0.62) than the  
350 Ascertained contrasts (0.16). This is expected. The magnitude of predicted  $\Delta p$  values is  
351 substantially greater in Ascertained relative to Paired contrasts. The exaggeration of predicted

352  $\Delta p$  inherent to the former group (winner's curse) reduces the slope. Finally, we note that the  
353 predicted  $\Delta p$  is strongly correlated between data halves ( $r = 0.86$ ,  $n = 587$ ,  $p < 0.00001$ ). No  
354 correlation is expected under neutrality.

355

356 Cross-validation for the allele frequency change test required subdivision of data from both  
357 years. We split the 2014 data into even and odd families and (arbitrarily) combined 2013-odd  
358 with 2014-odd. Then, as previously, we fit models (here the allele frequency change test) to  
359 each data half for each SNP and identified the most significant test per gene. As previously, both  
360 Ascertained and Paired contrast sets produce highly significant, positive correlations between  
361 observed and predicted  $\Delta p$  values ( $p < 0.00001$  for each in Fig 4D). Here, the regression slope is  
362 lower with Paired (0.61) than Ascertained SNPs (1.29). This change in pattern regarding the  
363 slopes between in Fig 4B and 4D is predicted given the nature of ascertainment for the allele  
364 frequency change test. Here, the observed  $\Delta p$  will be inflated relative the truth for Ascertained  
365 but not for Paired contrasts.

366

367 As a complement to cross-validation, we developed a full genome simulation program to  
368 generate data under the condition that prediction is ineffective (no true relationship between  
369 observed and expected). This simulator (Supplemental Appendix D) produces read-pair data  
370 equivalent in structure and amount to the real data. To this output, we can apply the full  
371 bioinformatic pipeline generating Figs 3-4 from the real data. The simulated data reiterates  
372 estimation error and is subject to the same ascertainment biases as the real data, but without real

373 allele frequency change. The latter is assured because we sample genotypes randomly from the  
374 set of genic-haplotypes present for each gene set (fitness is equal for all genic-genotypes).

375

376 We first applied the selection component models to simulation outputs to confirm our  
377 methodology for calling test p-values. We find, that when there is no selection, the sampling  
378 distribution of Likelihood Ratio Test values follows the chi-square density (Supplemental  
379 Appendix D). This is how we calculated p-values on tests with the real data. The observation  
380 of chi-square distributed LRT values simulations confirms the asymptotic normal theory for  
381 likelihood testing. Second, we confirmed that the cross-validation method eliminates the  
382 spurious association between predicted and observed  $\Delta p$  (null hypothesis for Figs 4B,D).  
383 Finally, the simulations confirm that a positive association between observed and predicted  
384 change is generated by estimation error in the un-partitioned data (Fig 4A,C). However, the  
385 covariance between observed and predicted is much greater for the real data than for the  
386 simulated data (0.020 vs 0.012 for male selection, 0.033 vs 0.012 for the allele frequency change  
387 test). Thus, the magnitude (if not simply the direction) of the covariance in Figs 3A,C is  
388 indicative of effective prediction.

389

390 In summary, the simulation and cross-validation procedures provide strong support that  
391 prediction is genuine. Unfortunately, it is much more difficult to determine the extent that  
392 apparent deviations between observed and predicted are due to sampling error as opposed to  
393 model error. The regressions of observed onto predicted  $\Delta p$  for Paired contrasts (Fig 4B,D) are  
394 the simplest parametric relationship to interpret. The slopes for these, 0.61 and 0.62, suggest that  
395 response is less than predicted, but this conclusion is very tentative. Simple estimation error in

396 the predictor of a linear regression causes a downward bias in the slope (here relative to one),  
397 even when there is no ascertainment bias [54]. This is non-trivial given that our SNP-specific  
398 predictions (and observations) of allele frequency change are encumbered with substantial  
399 estimation error. The relationship between estimation precision and experimental design,  
400 including sample size, is demonstrated in the companion paper [50].

401

402 Several biological factors may have reduced model accuracy. For example, we assumed that (a)  
403 there was no differential germination in the greenhouse (affected by genotype) when we grew  
404 progeny from maternal plants of 2013, (b) no seed bank contributed to the 2014 generation, and  
405 (c) no immigrant pollen or seed contributed to the 2014 population. Each of these influences  
406 could cause systematic deviations between observed and predicted  $\Delta p$ . Germination rates  
407 routinely differ between plant genotypes in an environment-dependent fashion, e.g. [55, 56].  
408 The field environment of 2014 (where plants germinated to produce our observed  $\Delta p$ ) is  
409 certainly different from the greenhouse (the offspring genotypes used to estimate  $p_M$  in 2013).  
410 This could cause substantial deviations, although they would be limited to genomic regions  
411 containing “germination genes.”

412

413 Prediction accuracy for many loci could be affected by the violations of the other assumptions:  
414 (b) seed bank or (c) gene flow. If selection varies substantially among years, and all evidence  
415 indicates that IM experiences strong fluctuations ([17, 22-25, 27] and results below), a seed bank  
416 can moderate temporal changes in allele frequency [57]. *M. guttatus* does not have seed  
417 dormancy [58], and at present, we have no evidence that a seed bank exists for IM. If it does

418 however, recruitment from the seed bank would probably act to reduce the magnitude of  
419 observed  $\Delta p$  relative to predicted. Finally, there certainly is some level of gene flow into IM  
420 from other populations [49]. However, the fact that IM is a very large population [49], coupled  
421 with the observation of substantial allele frequency divergence from neighboring population  
422 [59], suggest that the rate of immigration is quite low ( $\ll 1\%$ ). This level of gene flow might  
423 fundamentally alter long-term evolutionary dynamics (e.g. by introducing novel alleles), but  
424 should not have a dramatic effect on single-generation  $\Delta p$  values.

425

## 426 **Regularities in genome-wide selection**

427

428 In the previous section, we used the 2014 data simply to estimate the observed  $\Delta p$  from selection  
429 in 2013. However, the experimental design for 2014 allows a more detailed dissection of fitness  
430 variation within this generation. Viability selection estimated from the difference between  
431  $p_A$  and  $p_L$  (Fig 1B) was abundant: 39 genes pass the Bonferroni threshold and 226 have at least  
432 one SNP tests with  $p < 10^{-5}$  (Fig 3D). Male selection was considerably weaker in 2014 than  
433 2013: only 6  $p_A/p_M$  tests pass Bonferroni, 59 genes have a SNP with  $p < 10^{-5}$  (Fig 3C). The  
434 pattern of selection also changed. In 2013, there was a clear tendency for male selection to favor  
435 the minor (less frequent) allele (Fig 5A). The average predicted change of the minor allele  
436 frequency (MAF) was 0.055 (SE=0.009), which is significantly positive ( $n = 587$ ,  $t = 6.16$ ,  
437  $p < 0.001$ ). In 2014, the predicted change in minor allele frequency caused by male selection was  
438 close to zero. These data corroborate previous studies demonstrating changes in the  
439 direction/magnitude of genome-wide selection between generations, both in *Mimulus* [17] and

440 other systems, e.g. [12]. Absent such fluctuations (or other trade-offs), we would expect rapid  
441 fixation of one allele or the other, and the loss of fitness variation.

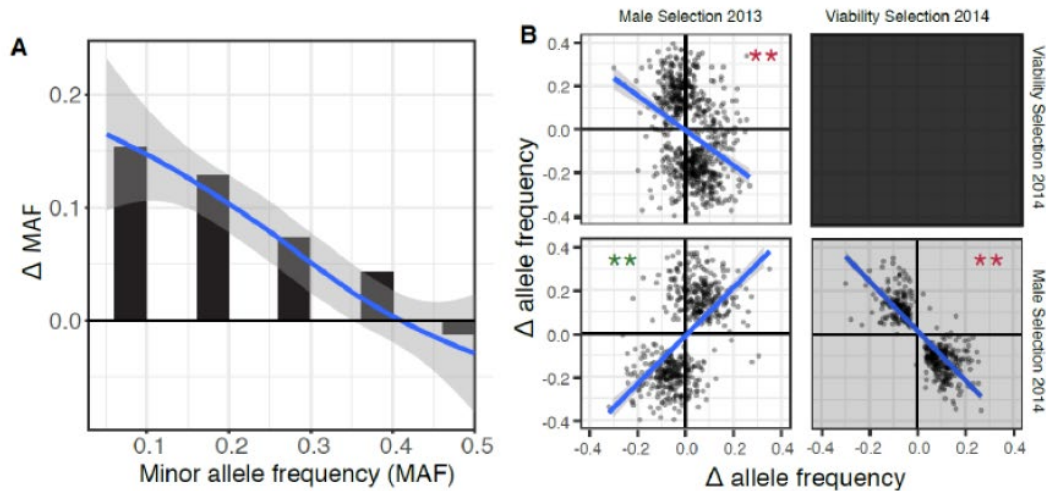

442

443 **Figure 5. (A) Male selection favored minor alleles in 2013. (B) Pairwise contrasts between**  
444 **predicted changes owing to male selection in 2013, viability selection in 2014, and male selection in**  
445 **2014. A single SNP per gene is reported (the most significant) if  $p < 10^{-5}$ .**

446

447 Selection components exhibit strong correlations indicating consistency in male selection across  
448 years and a trade-off between male selection in 2013 and viability in 2014 (Fig. 5B). To  
449 compare different components of selection, we selected the SNP within each gene set with the  
450 highest aggregate evidence for selection using Fisher's combined probability statistic [60].  
451 Alleles favored by male selection in 2013 were also favored by male selection in 2014 ( $n = 555$ ,  
452  $r = 0.57$ ,  $p < 10^{-48}$ ), but disfavored by viability selection in 2014 ( $n = 725$ ,  $r = -0.34$ ,  $p < 10^{-20}$ ). As  
453 expected from these results, there is also a negative correlation between male selection and  
454 viability within 2014 ( $r = -0.83$ ), but testing is complicated for this contrast because the two tests  
455 share a common parameter and thus subject to biases discussed previously.

456

457 We can perform a final contrast with a previous experiment that transplanted IM genotypes as  
458 seedlings into a neighboring field site at Browder Ridge. Browder Ridge has similar physical  
459 conditions as IM [17, 24, 25, 27]. The 2014 transplant [17] assayed 62 distinct IM genotypes for  
460 survival, each a cross between two of the 187 sequenced IM lines. Of SNPs indicating viability  
461 selection here ( $p < 10^{-5}$ ; Fig 3D), 28 showed at least suggestive evidence of viability selection in  
462 the transplant experiment (test p-value less than 0.1). Despite the small sample size, there is a  
463 strong positive correlation between predicted  $\Delta p$  between the two independent experiments ( $r =$   
464 0.53,  $p < 0.004$ ).

465

466 The contrast across years (Fig 5B) is an important confirmation of natural selection as the  
467 principle driver of  $\Delta p$ . If apparent changes were caused entirely by sampling and/or estimation  
468 error, the direction of change would not be correlated between independent datasets (2013 versus  
469 2014 plants). Recent studies in fully pedigreed populations of birds and mammals have clearly  
470 shown substantial allele frequency change through time [21, 61, 62]. The challenge has been to  
471 attribute changes to natural selection as opposed to genetic drift [21, 61]. In the present study,  
472 the sampled population ( $n$  is about 1000 individuals from each year) is orders of magnitude  
473 smaller than the number of reproductive individuals within the population each generation [49].  
474 The null hypothesis in our tests for selection is essentially experiment-level drift (differences in  
475 allele frequency caused by the finite numbers of parents and offspring). Experiment-level drift is  
476 necessarily much stronger than population level drift because  $n \ll N$ . Significant tests thus  
477 clearly implying selection, albeit with the caution that negative results (non-significant tests) do  
478 not imply that SNPs are evolving neutrally. Thus, undetected selection through measured

479 components, as well as selection via unmeasured fitness components make our results a  
480 conservative picture of the genome-wide extent of natural selection.

481

## 482 **Conclusions**

483 This experiment demonstrates strong, but often antagonistic, selection on hundreds of genes  
484 (Figs 3-5). The apparent trade-off between fitness components, as well as the correlations  
485 between allele frequency and direction of  $\Delta p$ , extend and corroborate previous experiments on  
486 this population. Figure 5B provides further evidence that Montane annual populations of *M.*  
487 *guttatus* exhibit a life-history trade-off between development rate and reproductive capacity. In  
488 most years (although not 2013 of this experiment), nearly all plants die owing to drought at  
489 approximately the same time, but *survival to flowering* differs greatly owing to varying rates of  
490 maturation [27, 63]. The current study shows clear evidence of a viability trade-off with male  
491 reproductive success, with male selection for minor alleles in 2013 likely mediated through  
492 positive effects on flower size in this year of favorable growth conditions. Furthermore,  
493 consistency between 2013 and 2014 in the direction of allelic effects on male fitness suggests  
494 that such tradeoffs are intrinsic and contribute to the maintenance of big/slow alleles at minor  
495 frequencies within IM [17, 26]. This is yet another of a growing body of examples relating  
496 antagonistic pleiotropy to polymorphism across diverse systems, e.g. [64].

497

498 Selection on both quantitative traits and specific genetic loci with major effects can be quite  
499 strong [1, 2, 65]. However, both conceptual and logistical difficulties have separated phenotype-  
500 level and locus-specific approaches, limiting inference about the extent, nature, and magnitude of  
501 selection on genetic variants across the genome. Our results (Fig 3) suggest that genotypic fitness



502 is broadly estimable, and that these estimates can predict allele frequency change across  
503 generations (Fig 4). A shortcoming of this study (considered in isolation from prior work at IM)  
504 is that the selection component estimates do not provide an ecological explanation for the  
505 observed selection on SNPs. As in quantitative genetics, we can obtain such an understanding  
506 by replicating the measurement of selection across different populations (or the same population  
507 through time) and then correlating selection estimates with environmental or ecological  
508 variables. Mechanistic insights may also come from combining phenotypic measurements with  
509 genotyping and fitness assays, linking GWA with selection component analyses. In summary, a  
510 broader application of genomic selection component methods, coupled with  
511 environmental/phenotypic data and population monitoring through time, should help to resolve  
512 the limits of population genetic prediction.

513

514

## 515 Materials and methods

516

### 517 A. Field sampling and progeny testing

518 *Mimulus guttatus* (syn *Erythranthe guttata*) is a wild flower species (Family: Phrymaceae)  
519 abundant throughout western North America [66]. The IM population, located in the central  
520 Oregon cascades (44.402217 N, -122.153317 W, Elevation ~1400 meters), is described in detail  
521 elsewhere [22, 24, 27]. In 2013, whole plants distributed in a grid across the IM population were  
522 collected (at senescence) into coin envelopes. In 2014, we established three primary transects  
523 (each ~10m) horizontally across the face of the slope, with approximately equal vertical spacing  
524 between transects. The transects were further subdivided into perpendicular sub-transects which

525 extended 0.3m on either side of the primary transect and were evenly spaced in 0.3m increments  
526 along the primary transect. We sampled five plants along each sub-transect by selecting the most  
527 proximal individual to a points placed at 10cm intervals. On July 15, 2014, we surveyed each  
528 transect and identified plants that would not progress to flower based on state of development  
529 relative to others in population. Assuming these plants would not have sufficient time to flower  
530 and set seed prior to season ending drought, this cohort (L) estimates  $p_L$  in Fig 1. To insure  
531 sufficient DNA from L plants, we transplanted these individuals into moistened peat pots filled  
532 with potting soil and reared them to sufficient size for DNA extraction. We first sampled plants  
533 for the adult cohort of 2014 ( $p_A$  in Figure 1) on July 21, 2014. We only sampled adults once all  
534 plants within their sub-transect fully dried down. We collected whole plants, after confirming  
535 they had begun setting seed, into envelopes, so that both seed and maternal tissue could be  
536 separated for planting and DNA extraction, respectively. The remaining adults were harvested  
537 on July 27. Given seed collections from both years, we germinated and grew 2-4 progeny from  
538 each field plant in the University of Kansas greenhouse. We harvested dried leaf and calyx  
539 tissue from field collected parental plants and young leaves from greenhouse germinated progeny  
540 for subsequent DNA extraction[67]. To determine the overall proportion of the population that  
541 survived to flower in 2014, we surveyed a random set of 1000 seedlings marked early in the  
542 season at the nearby BR location[59]. 700 of these plants eventually flowered.

543

#### 544 **B. Library preparation, sequencing, SNP calling, and scoring read pairs**

545 We collected paired-end sequence reads from 1936 experimental plants (2013: 207 field plants  
546 and 685 progeny; 2014: 383 field plants and 661 progeny) using Illumina technology. For field  
547 plants and their progeny, we generated genomic libraries using Multiplexed-Shotgun-Genotyping

548 (MSG)[41], a form of RADseq [68] that uses a restriction enzyme to reduce genomic  
549 representation to homologous loci that are flanked by restriction cut sites. We digested genomic  
550 DNA from each plant using the frequent-cutting restriction enzyme MseI (NEB Biolabs). Each  
551 DNA sample was ligated to one of 96 distinct barcoded adaptors, each containing a unique 6 bp  
552 barcode. Each set of these barcoded samples is then pooled independently to create a sub-  
553 library. After PCR, we size-selected our library for 250-300bp fragments using a Pippin Prep  
554 (<http://www.sagescience.com/products/pippin-prep/>). We then performed PCR reactions at 12  
555 cycles using Phusion High-Fidelity PCR Master Mix (NEB Biolabs) and primers that bind to  
556 common regions in the adaptors. In the PCR step, each sub-library was combined with one of 24  
557 distinct Illumina indices allowing multi-plexing of the sub-libraries. To remove primer dimers,  
558 we did two rounds of AMPure XP bead cleanup (Beckman Coulter, Inc) using a 0.8 bead volume  
559 to sample ratio. Libraries were sequenced with 100-bp paired-end reads on the Illumina HiSeq  
560 2500 with a 10% phiX spike-in. The specific program commands used to call SNPs in the MSG  
561 data are described in Supplemental Appendix A. We suppressed Indels and all SNPs with more  
562 than two nucleotides segregating.

563

564 Sequencing and variant calling on the 187 reference panel genomes from IM was described  
565 previously[17]. We first imputed the few missing calls in these genomes and then extracted the  
566 sequence for each reference genome within each gene set (detailed procedures in Supplemental  
567 Appendix B). Sequence variation is very high in *M. guttatus*[49], and as a consequence, it is  
568 difficult to effectively call variants outside genic regions. We thus established gene sets as units  
569 for analysis. A set is either a single gene or a collection of closely linked (within 100bp) and/or  
570 overlapping genes. After suppressing genes prone to paralogous or otherwise spurious read

571 mapping, 15,360 gene sets were retained for subsequent analysis (Supplemental Table S1).  
572 Finally, we noted that some SNPs were completely redundant – owing to perfect association in  
573 the reference panel, they always produced the same genotype likelihoods in field plants. We  
574 thinned sets of fully redundant SNPs to a single representative SNP leaving 1,523,410 SNPs for  
575 selection estimation.

576  
577 The data units for likelihood calculations (eq 1) are read-pairs scored for each polymorphic SNP  
578 that they overlap within a gene set. We aligned the read-pairs from each plant to the whole  
579 genome sequences, and within each gene set, and calculated  $U_{[plantID],i,j}$  for each possible genic-  
580 genotype  $[i,j]$ .  $U_{[plantID],i,j}$  is the likelihood for the full collection of read-pairs from a plant  
581 given that its diploid genic-genotype is  $[i,j]$ , where  $i$  and  $j$  index genic haplotypes. Based on the  
582 low mismatch rate to genic haplotypes (as a whole), we set  $\epsilon = 0.005$  for calculation of eq (1)  
583 described below. We calculated  $U_{[plantID],i,j}$  for each combination of gene set, plant, and genic-  
584 genotype using python scripts p1.py, p2.py, p3.py, p.Uij.2013.py and p.Uij.2014.py  
585 (Supplemental file 1). Application of these programs indicate that some closely linked SNPs  
586 were completely redundant – they always had exactly the same genotype calls in field plants.  
587 We thinned these cases to a single SNP.

588

### 589 **C. *Drosophila melanogaster* analysis**

590 The *Drosophila* Synthetic Population Resource (DSPR) consists of two multiparental, advanced  
591 generation intercross mapping populations [42, 51]. Each population (A and B) was initiated  
592 with eight inbred founder strains, with one strain common to both populations (i.e., 15 founders  
593 in total). Following 50 generations of free recombination, a series of Recombinant Inbred Lines

594 (RILs) were initiated by 25 generations of sibling mating. The founder genomes were sequenced  
595 to 50X coverage and the RILs subjected to RAD-seq using SgrAI, an 8-cutter, as the restriction  
596 enzyme [42, 69]. Given these data, we are able to infer the mosaic founder haplotype structure  
597 of each RIL at >10,000 positions covering the genome.

598

599 We collected MSG RADseq data using the same protocol as described above for the *Mimulus*  
600 experiment, except that these data are 94bp single end sequences instead of the PE100  
601 sequencing for *Mimulus*. We chose 60 of the RILs for the present study equally split between  
602 set A and set B of the DSPR. For each collection, there are only 8 possible ancestral genomes,  
603 but we ran the analysis blind to this information (thus inference among 15 possible ancestral  
604 alleles was required). The reads were processed with fastp (<https://github.com/OpenGene/fastp>)  
605 and then we mapped to the FlyBase r5.56 genome build (<https://flybase.org/>) and called SNPs  
606 following the procedures used for *Mimulus* (Supplemental Appendix A). We used the  
607 annotation (dmel-all-r5.56.gff) to establish a list of 13,384 gene sets applying the same rules as  
608 for *Mimulus* (Supplemental Table S3). Next, we determined the intersection between SNPs  
609 within the ancestral genomes (final\_snptable\_foundersonly.txt downloaded from  
610 <http://wfitch.bio.uci.edu/~dspr/>) and those called in the MSG RIL data, a total of 107,878 bi-  
611 allelic SNPs (Supplemental Table S4). We found that 8900 of these 13,384 gene sets had at least  
612 one SNP scored in MSG data and could thus be used for downstream analysis. After eliminating  
613 uninformative reads, a total of 15,488,651 remained across the 60 RILs. We next adapted the  
614 *Mimulus* programs (python scripts p1.py, p2.py and p3.py in Supplemental file 1) to determine  
615 predicted ancestry based of the DSPR RILs and matched the inferred ancestry to the “known”  
616 ancestry of each RIL. The latter was established previously: We downloaded files

617 HMMregA\_R2.txt and HMMregB\_R2.txt from <http://wfitch.bio.uci.edu/~dspr/> (also available at  
618 <https://datadryad.org/stash/dataset/doi:10.5061/dryad.r5v40>). We processed the *D. melanogaster*  
619 reference into ‘gene units’ by the same method applied to the *Mimulus* genome. Read mapping  
620 and SNP calling were executed using the same techniques. The great majority of *D.*  
621 *melanogaster* reads overlap 3 or fewer SNPs and are thus less informative than the *Mimulus*  
622 read-pairs (Supplemental Figure S1). We then applied the inference programs using the 15  
623 ancestral sequences of the DSPR as genic haplotypes.

624

#### 625 **D. Likelihood of the field data with and without selection**

626

627 Selection component analyses (SCA [43, 46]) are based on population genetic models that  
628 predict allele frequency change from observations of viability, fecundity, and mating success  
629 [47]. SCA estimate selection from differences in allele frequency between distinct “cohorts”  
630 within a population, e.g. individuals that survive to reproduce and those that do not (viability  
631 selection) or those that acquire mates and those that do not (sexual selection) [48]. Given  
632 random sampling of individuals, the likelihood of the entire dataset ( $L$ ) is a product across  
633 families:

634

$$L = \prod_{y=1}^F L_y$$

635

(2)

636

637 where  $F$  is the number of families and  $L_y$  is the likelihood for family  $y$ . Families consist of a  
 638 single individual if that plant failed to survive to reproduce. For survivors, the family is the field  
 639 plant and a sample of their progeny. The log-transformed likelihood:

$$640 \quad \ln L = \sum_{y=1}^F \ln \left\{ \sum_{i,j \geq i}^K P[M_y = i, j] P[Data_y | M_y = i, j] \right\}$$

641 (3)

642 where  $P[M_y = i, j]$  is the (prior) probability that the maternal genic-genotype has genic-  
 643 haplotypes  $i$  and  $j$ .  $K$  is the number of distinct sequences for this gene set.  $P[Data_y | M_y = i, j]$  is  
 644 the probability of all data from family  $y$  (genetic and fitness measurements) given maternal  
 645 genotype  $[i, j]$ . The family likelihood is:

$$646 \quad P[Data_y | M_y = i, j] = U_{y,i,j} \prod_z^{O_y} V_{yz,i,j}$$

647 (4)

648  
 649  $U_{y,i,j}$  is the probability maternal plant  $y$  produced the observed read-pairs given genic-genotype  
 650  $[i, j]$ ,  $V_{yz,i,j}$  is the probability of the observed read-pairs for offspring  $z$  of maternal plant  $y$  with  
 651 genic-genotype  $[i, j]$ , and  $O_y$  is number of genotyped offspring of maternal plant  $y$ . For  
 652 individuals that fail to reproduce,  $[Data_y | M_y = i, j] = U_{y,i,j}$ . The likelihood for each  
 653 offspring,  $V_{yz,i,j}$  in eq 4, depends on whether that offspring is outcrossed or selfed (see Methods  
 654 section E). If offspring  $yz$  is selfed:

$$655 \quad V_{yz,i,j} = \frac{1}{4} U_{yz,i,i} + \frac{1}{2} U_{yz,i,j} + \frac{1}{4} U_{yz,j,j}$$

656 (5)

657

658 We assume that each outcrossed progeny is sired independently and that

$$659 \quad V_{yz,i,j} = \sum_{k=1}^K P[D_{yz} = k] \frac{1}{2} (U_{yz,i,k} + U_{yz,j,k})$$

660 (6)

661

662  $U_{yz,v,w}$  is the probability of the observed read-pairs from offspring  $yz$  given that it has genic-  
663 genotype  $[v,w]$ .  $P[D_{yz} = k]$  is the probability that the sire of offspring  $yz$  transmitted genic-  
664 haplotype  $k$  to this offspring. The  $(1/2)$  reflects the equal probability of transmission for either  
665 maternal allele ( $i$  or  $j$ ) to the offspring. Through all these calculations, we assume that  
666 recombination within gene sets has a negligible effect on the probabilities.

667

668 The various models of selection (Fig. 1) consider different constraints on the genotype  
669 probabilities. Given the large number of genic-genotypes, the potential parameter space is very  
670 large. Here, we simplify by classifying all genic-haplotypes into two groups based on their allele  
671 at a particular SNP. We assume the sequences in a group are equivalent in terms of fitness  
672 effects. This reduces all genic-haplotypes at a gene set into two “alleles” for selection tests.  
673 This classification naturally changes with SNP chosen and thus we apply the procedure to each  
674 SNP in sequence. This simplification is a sensible first step, but we acknowledge that it may fail  
675 to capture the genotype-to-fitness mapping for many genes. In some cases, alternative alleles  
676 may be defined by numerous SNPs or indels within a gene [70, 71] and fitness effects would be  
677 more naturally described with an allelic series. Our ‘binning’ of functionally distinct alleles  
678 could elevate the Type I error rate (we fail to see selection when it is occurring).



679

680 Let  $S_R$  represent the set of genic haplotypes that have the reference base at the focal SNP and  $S_A$

681 is the set with the alternative base. Then eq (6) can be written:

$$V_{yz,i,j} = \sum_{v \in S_R} P[D_{yz} = v] \frac{1}{2} (U_{yz,i,v} + U_{yz,j,v}) + \sum_{w \in S_A} P[D_{yz} = w] \frac{1}{2} (U_{yz,i,w} + U_{yz,j,w})$$

(7)

684

685 The frequency of the reference base (for the focal SNP) within the population of genic-

686 haplotypes,  $p$ , is just  $\sum_{k=1}^K \delta_k Q_k$ , where  $Q_k$  is the frequency of haplotype  $k$  among the lines and

687  $\delta_k$  is an indicator variable (1 if haplotype  $k$  carries the reference base and 0 otherwise). Of

688 course, the frequency of the reference base can differ between the sequence line set and the

689 natural population, and also between subsets of the natural population (e.g. alive versus dead).

690 Let  $p^*$  denote the frequency of the reference base in a specific field cohort, say adults in 2013 or

691 zygotes in 2014. We adjust genic-haplotypes proportionally as a function of  $p^*$ :

$$Q_k^* = Q_k \frac{p^*}{p} \text{ if } k \in S_R, \quad Q_k^* = Q_k \frac{(1-p^*)}{(1-p)} \text{ if } k \in S_A$$

(8)

693

694 This is essentially a uniform inflation or deflation of haplotype frequencies based on the focal

695 SNP. It allows us to write the likelihood equations explicitly in terms of allele frequencies at one

696 SNP (e.g.  $p_L$ ,  $p_A$ , and  $p_M$  in Figure 1) while retaining the full information from gene sets. For

697 example,  $P[M_y = i, j]$ , in eq (3) becomes  $2Q_i^* Q_j^*$  if  $i \neq j$  or  $Q_i^{*2}$  if  $i = j$ . This is a function of known

698 fixed values ( $p$ ,  $Q_i$ ,  $Q_j$ ) and the parameter to be estimated (e.g.  $p_A$  if the maternal plant survived,

699  $p_L$  if not). Equation (7) becomes:

700

$$\begin{aligned} 701 \quad V_{yz,i,j} &= \sum_{v \in S_R} Q_v \frac{p_M}{p} \frac{1}{2} (U_{yz,i,v} + U_{yz,j,v}) + \sum_{w \in S_A} Q_w \frac{1-p_M}{1-p} \frac{1}{2} (U_{yz,i,w} + U_{yz,j,w}) \\ 702 \\ 703 \quad &= p_M T_1 + (1-p_M) T_2 \\ 704 \quad & \quad \quad \quad (9) \end{aligned}$$

705

706  $T_1$  and  $T_2$  distill all quantities in eq (9) that are coefficients for  $p_M$  and  $(1-p_M)$ . The fact that  
707 these coefficients are determined entirely by the read-pairs from field plants and the set of genic-  
708 haplotypes means that they do not change with  $p_M$ . Thus, the numerically intensive sum of eq  
709 (6) need only be calculated once at the onset of a maximum likelihood search. We use Powell's  
710 algorithm [72] to maximize likelihoods. At each SNP, we fit a series of models of increasing  
711 complexity (Fig. 1). Likelihood ratio tests are used to evaluate whether more general models are  
712 superior to simpler models. The code to perform these tests was written in the C programming  
713 language, is described in Supplemental Appendix C, and is included in Supplemental File 1.

714

## 715 **E. Mating system estimation**

716 The MSG data (without the reference sequences) was used to determine individual offspring as  
717 outcrossed or selfed using BORICE [73]. The most informative SNPs for mating system  
718 estimation exhibit high coverage across samples and intermediate allele frequency. From the full  
719 set of MSG samples called simultaneously (Supplemental Table S5), we chose one SNP per gene  
720 with the highest count for (heterozygotes+the less frequent homozygote) using python program  
721 p4.py (Supplemental File 1). We then extracted genotype likelihoods for these SNPs (directly  
722 from the vcf file, Supplemental Table S5) and organized the samples into families (maternal

723 plants with offspring) to produce a BORICE-format input file using python program p5.py  
724 (Supplemental File 1). We next thinned the dataset to SNPs with at least 800 called plants  
725 (across both years) producing the input file used for estimation of mating system (Supplemental  
726 Table S6) consisting of 2773 SNPs, each in a distinct gene. These SNPs are well distributed  
727 across all 14 chromosomes. We conducted preliminary MCMC runs to determine parameter step  
728 sizes, burn-in duration, and chain length. After setting these (Control file and the specific  
729 BORICE code are in Supplemental File 1), we estimated posterior probabilities for each  
730 offspring as outcrossed/selfed and the inbreeding level of maternal plants by combining four  
731 independent chains.

732

733 Considering offspring with at least one read at 100 or more SNPs, 10.1% were determined to be  
734 selfed in 2013 (54 of 537) versus 9.4% in 2014 (48 of 508). The remaining offspring, where  
735 there was insufficient data for estimation, were set as outcrossed for the subsequent selection  
736 analyses. While this classification may be incorrect for a few individuals, error has a minimal  
737 effect on parameter estimates given the absence of genotypic data for these offspring. The  
738 observed rate of selfing (ca. 10%) matches results from prior mating system studies of the IM  
739 population[74]. The detailed results are reported in Supplemental Table S7.

740

#### 741 **F. Predicted and observed allele frequency change**

742 We contrast different selection estimates in the common currency of predicted allele frequency  
743 change,  $\Delta p$ . Considering the change from adults to zygotes of the next generation, the predicted  
744 change due to male selection is  $\Delta p = (p_M - p_A)/2$ . This equation assumes no differential  
745 female fecundity (associated with the SNP) and that all progeny are produced by outcrossing

746 (diploid loci are half male and half female). In fact, we found that ca. 10% of our offspring were  
747 derived from selfing (see section **E**). This could (slightly) inflate predicted change relative to  
748 observed change (Fig 3). However, given that the inflation is uniform, it does not affect  
749 arguments about significance (Fig 2), allele frequency (Fig 4) or trade-offs (Fig 4). The  
750 predicted change owing to viability selection in 2014 is calculated from model H<sub>3</sub> (Fig 1)  
751 estimates,  $p_A$  and  $p_L$ . The relevant relationship is  $p_Z = \alpha p_A + (1 - \alpha) p_L$ , where  $p_Z$  is allele  
752 frequency in zygotes (before selection) and  $\alpha$  is the fraction of individuals that survive to  
753 reproduce. For our experiment, we estimate  $\alpha = 0.7$  (see above in section **A**). Rearranging the  
754 equation, the predicted change owing to viability selection is  $\Delta p = 0.3(p_A - p_L)$ . The observed  
755  $\Delta p$  estimates (Fig 3) require an estimate of allele frequency in zygotes ( $p_Z$ ) from 2014. This can  
756 be estimated in several ways given the four models applied to the 2014 data (H<sub>0</sub>-H<sub>3</sub> in Fig. 1),  
757 but  $p$  from H<sub>0</sub> is a robust choice. This value is always intermediate to parameter estimates from  
758 models that are more elaborate.

759

760 To obtain  $\Delta p$  from the viability data from the transplant experiment in 2014 at BR[17], we first  
761 determined the 1,358,005 SNPs in common between the SCA (results of this study) and the  
762 genotypes used in that study. We assayed 355 transplants (an average of 5.7 replicates per  
763 genotypes) for survival and seed set of survivors in the 2014 transplant. We eliminated SNPs  
764 where the count of minor homozygote plus heterozygotes was fewer than five. For the  
765 remainder, we regressed the fitness measure, either fraction surviving or mean Ln(seedset of  
766 survivors), onto plant genotype at each SNP, the latter scored as the count of Reference alleles  
767 (0,1,2). A linear model for selection was used instead of estimating the mean for each genotype  
768 (RR, RA, AA) because there were often few or no representatives of the minor homozygote

769 (only 62 distinct hybrid genotypes were assayed in the 2014 transplant). For viability selection,  
770 the predicted change is  $\Delta p = b_v p_Z (1 - p_Z) / w_v$ , where  $b_v$  is the regression coefficient and  
771  $w_v=0.46$  is the mean viability among transplants. Allele frequency,  $p_Z$ , was taken from the 2014  
772 SCA model  $H_0$ .

773

774

775 **Supporting information**

776 Supplemental Appendix. The detailed methods sections for (A) Bioinformatic processing of  
777 MSG data, (B) Delineating gene sets and SNPs, (C) Selection component models, and (D)  
778 Whole-genome data simulation.

779

780 Supplemental Table S0. The most significant SNP per gene is reported for  $p_A/p_M$  in 2013,  
781  $p_A/p_M$  in 2014, viability selection in 2014, and the change test (2013 adults to 2014 zygotes).  
782 The chosen for each test are reported on a separate sheet. Statistics from all model fits are  
783 reported for each SNP.

784

785 Supplemental Table S1. The gene sets are located to the genome sequence and the number  
786 distinct genic-haplotypes per gene set is reported.

787

788 Supplemental Table S2. The number of SNPs covered per read-pair in the Mimulus field plants.  
789 After discarding read-pairs that overlap no SNPs, slightly more than 99 million remained.

790

791 Supplemental Table S3. The collection of genes and gene sets for the Drosophila application:  
792 "Gene.coordinates.txt".

793

794 Supplemental Table S4. Variants used in Drosophila application: "SNPs.in.both.txt"

795

796 Supplemental Table S5. The Variant Call File (vcf) for all msg samples across both field  
797 seasons is given for each chromosome separately.

798

799 Supplemental Table S6. The BORICE formatted input file for mating system estimation.

800

801 Supplemental Table S7. The estimated posterior probabilities that each offspring is outcrossed  
802 and for the Inbreeding History (IH) level of maternal plant is reported.

803

804 Supplemental Figure S1. The number of SNPs per read (Blue = *Drosophila*) or read-pair (Orange  
805 = *Mimulus*) is reported as a histogram.

806

807 File S1 key. A key to the programs contained in Supplemental File 1.

808

809 Supplemental File 1. The 14 programs used to analyze and simulate data (detailed descriptions  
810 contained in File S1 key).

811

## 812 **Acknowledgements**

813 We thank C. Friesen (U.S. Forest Service) for site access and the KU ACF for computing  
814 resources. J Stinchombe suggested the data splitting for cross-validation and we received

815 essential editorial advice from J. Willis and R. Unckless. Sequencing was conducted at the KU  
816 genomics core (supported by the CMADP COBRE P20GM103638).

817

### 818 **Author Contributions**

819 PJM and JKK conceived the project. PJM and LF conducted the field experiments. PJM  
820 directed library construction and sequencing for *Mimulus*. SJM directed library construction and  
821 sequencing for *Drosophila*. JKK wrote the theory and the analytical programs. JC and JKK  
822 analyzed the data. JKK wrote the paper with substantial input from all co-authors.

823

### 824 **Availability of data and materials**

825 The Illumina reads from both *Mimulus* and *Drosophila* will be deposited in the Sequence Read  
826 Archive (NCBI) prior to publication. Computer programs to conduct the analyses have been  
827 included as Supplementary Materials.

828

829

830



831 **References**

832

- 833 1. Endler JA. Natural selection in the wild. Princeton NJ: Princeton University Press; 1986. 336 p.
- 834 2. Ford EB. Ecological genetics. 3rd ed. London: Chapman and Hall; 1971.
- 835 3. Clegg MT, A. L. Kahler, and R. W. Allard. Estimation of life cycle components of selection in an  
836 experimental plant population. *Genetics*. 1978;89:765-92.
- 837 4. Mérot C, Llaurens V, Normandeau E, Bernatchez L, Wellenreuther M. Balancing selection via life-  
838 history trade-offs maintains an inversion polymorphism in a seaweed fly. *Nature Communications*.  
839 2020;11(1):670. doi: 10.1038/s41467-020-14479-7.
- 840 5. Schwander T, Libbrecht R, Keller L. Supergenes and Complex Phenotypes. *Current Biology*.  
841 2014;24(7):R288-R94. doi: <https://doi.org/10.1016/j.cub.2014.01.056>.
- 842 6. Joron M, Frezal L, Jones RT, Chamberlain NL, Lee SF, Haag CR, et al. Chromosomal  
843 rearrangements maintain a polymorphic supergene controlling butterfly mimicry. *Nature*. 2011;477:203.  
844 doi: 10.1038/nature10341  
845 <https://www.nature.com/articles/nature10341#supplementary-information>.
- 846 7. Barrett RDH, Hoekstra HE. Molecular spandrels: tests of adaptation at the genetic level. *Nature*  
847 *Reviews Genetics*. 2011;12(11):767-80. doi: 10.1038/nrg3015.
- 848 8. Küpper C, Stocks M, Risse JE, dos Remedios N, Farrell LL, McRae SB, et al. A supergene  
849 determines highly divergent male reproductive morphs in the ruff. *Nature Genetics*. 2016;48(1):79-83.  
850 doi: 10.1038/ng.3443.
- 851 9. Subramaniam B, Rausher MD. Balancing selection on a floral polymorphism. *Evolution*.  
852 2000;54(2):691-5.
- 853 10. Lindholm AK, Dyer KA, Firman RC, Fishman L, Forstmeier W, Holman L, et al. The Ecology and  
854 Evolutionary Dynamics of Meiotic Drive. *Trends in Ecology & Evolution*. 2016;31(4):315-26. doi:  
855 <https://doi.org/10.1016/j.tree.2016.02.001>.
- 856 11. Barrett RDH, Laurent S, Mallarino R, Pfeifer SP, Xu CCY, Foll M, et al. Linking a mutation to  
857 survival in wild mice. *Science*. 2019;363(6426):499-504. doi: 10.1126/science.aav3824.
- 858 12. Bergland AO, Behrman EL, O'Brien KR, Schmidt PS, Petrov DA. Genomic Evidence of Rapid and  
859 Stable Adaptive Oscillations over Seasonal Time Scales in *Drosophila*. *PLOS Genetics*.  
860 2014;10(11):e1004775. doi: 10.1371/journal.pgen.1004775.
- 861 13. Therkildsen NO, Hemmer-Hansen J, Als TD, Swain DP, Morgan MJ, Trippel EA, et al.  
862 Microevolution in time and space: SNP analysis of historical DNA reveals dynamic signatures of selection  
863 in Atlantic cod. *Molecular Ecology*. 2013;22(9):2424-40. doi: 10.1111/mec.12260.
- 864 14. Machado HE, Bergland AO, Taylor R, Tilk S, Behrman E, Dyer K, et al. Broad geographic sampling  
865 reveals predictable, pervasive, and strong seasonal adaptation in *Drosophila*. *bioRxiv*. 2019:337543. doi:  
866 10.1101/337543.
- 867 15. Soria-Carrasco V, Gompert Z, Comeault AA, Farkas TE, Parchman TL, Johnston JS, et al. Stick  
868 Insect Genomes Reveal Natural Selection's Role in Parallel Speciation. *Science*. 2014;344(6185):738-42.  
869 doi: 10.1126/science.1252136.
- 870 16. Anderson JT, Lee C-R, Mitchell-Olds T. STRONG SELECTION GENOME-WIDE ENHANCES FITNESS  
871 TRADE-OFFS ACROSS ENVIRONMENTS AND EPISODES OF SELECTION. *Evolution*. 2014;68(1):16-31. doi:  
872 10.1111/evo.12259.
- 873 17. Troth A, Puzey JR, Kim RS, Willis JH, Kelly JK. Selective trade-offs maintain alleles underpinning  
874 complex trait variation in plants. *Science*. 2018;361(6401):475-8. doi: 10.1126/science.aat5760.
- 875 18. Exposito-Alonso M, Exposito-Alonso M, Gómez Rodríguez R, Barragán C, Capovilla G, Chae E, et  
876 al. Natural selection on the *Arabidopsis thaliana* genome in present and future climates. *Nature*.  
877 2019;573(7772):126-9. doi: 10.1038/s41586-019-1520-9.

- 878 19. Monnahan PJ, Colicchio J, Kelly JK. A genomic selection component analysis characterizes  
879 migration-selection balance. *Evolution*. 2015;69(7):1713-27. doi: 10.1111/evo.12698.
- 880 20. Flanagan SP, Jones AG. Genome-wide selection components analysis in a fish with male  
881 pregnancy. *Evolution*. 2017;71(4):1096-105. doi: 10.1111/evo.13173.
- 882 21. Chen N, Juric I, Cosgrove EJ, Bowman R, Fitzpatrick JW, Schoech SJ, et al. Allele frequency  
883 dynamics in a pedigreed natural population. *Proceedings of the National Academy of Sciences*.  
884 2019;116(6):2158-64. doi: 10.1073/pnas.1813852116.
- 885 22. Fishman L, Kelly JK. Centromere-associated meiotic drive and female fitness variation in  
886 *Mimulus*. *Evolution*. 2015;69(5):1208-18. doi: 10.1111/evo.12661.
- 887 23. Lee YW, Fishman L, Kelly JK, Willis JH. A Segregating Inversion Generates Fitness Variation in  
888 Yellow Monkeyflower (*Mimulus guttatus*). *Genetics*. 2016;202(4):1473-84. doi:  
889 10.1534/genetics.115.183566.
- 890 24. Mojica JP, Lee YW, Willis JH, Kelly JK. Spatially and temporally varying selection on  
891 intrapopulation quantitative trait loci for a life history trade-off in *Mimulus guttatus*. *Molecular ecology*.  
892 2012;21(15):3718-28.
- 893 25. Monnahan PJ, Kelly JK. Naturally segregating loci exhibit epistasis for fitness. *Biology Letters*.  
894 2015;11(8). doi: 10.1098/rsbl.2015.0498.
- 895 26. Kelly JK. Testing the rare alleles model of quantitative variation by artificial selection. *Genetica*.  
896 2008;132(2):187-98.
- 897 27. Mojica JP, Kelly JK. Viability selection prior to trait expression is an essential component of  
898 natural selection. *Proceedings of the Royal Society B-Biological Sciences*. 2010;277(1696):2945-50. doi:  
899 10.1098/rspb.2010.0568. PubMed PMID: ISI:000281312400008.
- 900 28. Hill WG. Understanding and using quantitative genetic variation. *Philosophical transactions of*  
901 *the Royal Society of London Series B, Biological sciences*. 2010;365(1537):73-85. doi:  
902 10.1098/rstb.2009.0203. PubMed PMID: 20008387.
- 903 29. Grant PR, Grant RB. Prediction Microevolutionary Responses to Directional Selection on Heritable  
904 Variation. *Evolution*. 1995;49:241-51.
- 905 30. Morrissey MB. SELECTION AND EVOLUTION OF CAUSALLY COVARYING TRAITS. *Evolution*.  
906 2014;68(6):1748-61. doi: 10.1111/evo.12385.
- 907 31. Bonnet T, Wandeler P, Camenisch G, Postma E. Bigger Is Fitter? Quantitative Genetic  
908 Decomposition of Selection Reveals an Adaptive Evolutionary Decline of Body Mass in a Wild Rodent  
909 Population. *PLOS Biology*. 2017;15(1):e1002592. doi: 10.1371/journal.pbio.1002592.
- 910 32. Bonnet T, Morrissey MB, Morris A, Morris S, Clutton-Brock TH, Pemberton JM, et al. The role of  
911 selection and evolution in changing parturition date in a red deer population. *PLOS Biology*.  
912 2019;17(11):e3000493. doi: 10.1371/journal.pbio.3000493.
- 913 33. Lewontin RC. The genetic basis of evolutionary change. New York, NY: Columbia University  
914 Press; 1974.
- 915 34. Falconer DS, Mackay TFC. Introduction to quantitative genetics. 4th ed. Essex, England: Prentice  
916 Hall; 1996.
- 917 35. Lande R, Arnold S. The measurement of selection on correlated characters. *Evolution*.  
918 1983;37:1210-26.
- 919 36. Morrissey MB, Parker DJ, Korsten P, Pemberton JM, Kruuk LEB, Wilson AJ. THE PREDICTION OF  
920 ADAPTIVE EVOLUTION: EMPIRICAL APPLICATION OF THE SECONDARY THEOREM OF SELECTION AND  
921 COMPARISON TO THE BREEDER'S EQUATION. *Evolution*. 2012;66(8):2399-410. doi: 10.1111/j.1558-  
922 5646.2012.01632.x.
- 923 37. Rausher MD. The measurement of selection on quantitative traits: biases due to the  
924 environmental covariances between traits and fitness. *Evolution*. 1992;46:616-26.

- 925 38. Meuwissen TH, Hayes BJ, Goddard ME. Prediction of total genetic value using genome-wide  
926 dense marker maps. *Genetics*. 2001;157(4):1819-29. PubMed PMID: 11290733.
- 927 39. Jannink J-L, Lorenz AJ, Iwata H. Genomic selection in plant breeding: from theory to practice.  
928 Briefings in Functional Genomics. 2010;9(2):166-77. doi: 10.1093/bfgp/elq001.
- 929 40. Hayes BJ, Bowman PJ, Chamberlain AJ, Goddard ME. Invited review: Genomic selection in dairy  
930 cattle: Progress and challenges. *Journal of Dairy Science*. 2009;92(2):433-43. doi:  
931 <https://doi.org/10.3168/jds.2008-1646>.
- 932 41. Andolfatto P, Davison D, Erezyilmaz D, Hu TT, Mast J, Sunayama-Morita T, et al. Multiplexed  
933 shotgun genotyping for rapid and efficient genetic mapping. *Genome research*. 2011;21(4):610-7. doi:  
934 10.1101/gr.115402.110. PubMed PMID: WOS:000289067800011.
- 935 42. King E, Merkes C, McNeil C, Hofer S, Sen S, Broman K, et al. Genetic dissection of a model  
936 complex trait using the *Drosophila* Synthetic Population Resource. *Genome Research* 2012;22:1558-66.
- 937 43. Christiansen F, Frydenberg O. Selection component analysis of natural polymorphisms using  
938 population samples including mother-offspring combinations. *Theoretical Population Biology*.  
939 1973;4:425-45.
- 940 44. Stanton ML. Male-Male Competition During Pollination in Plant Populations. *The American*  
941 *Naturalist*. 1994;144:S40-S68.
- 942 45. Delph LF. Pollen competition is the mechanism underlying a variety of evolutionary phenomena  
943 in dioecious plants. *New Phytologist*. 2019;224(3):1075-9. doi: 10.1111/nph.15868.
- 944 46. Allard RW, Kahler AL, Clegg MT. Estimation of Mating Cycle Components of Selection in Plants.  
945 In: Christiansen FB, Fenchel TM, editors. *Measuring Selection in Natural Populations*. Lecture Notes in  
946 Biomathematics. Berlin, Heidelberg: Springer; 1977.
- 947 47. Crow JF, Kimura M. An introduction to population genetics theory. New York: Harper and Row;  
948 1970.
- 949 48. Bundgaard J, Christiansen FB. Dynamics of polymorphisms. I. Selection components in an  
950 experimental population of *Drosophila melanogaster*. *Genetics*. 1972;71:439-60.
- 951 49. Puzey JR, Willis JH, Kelly JK. Population structure and local selection yield high genomic variation  
952 in *Mimulus guttatus*. *Molecular Ecology*. 2017;26(2):519-35. doi: 10.1111/mec.13922.
- 953 50. Kelly J. The promise and deceit of genomic selection analyses. *Proceedings of the Royal Society*  
954 *B: Biological Sciences* 2020;submitted.
- 955 51. King EG, Macdonald SJ, Long AD. Properties and Power of the *Drosophila* Synthetic Population  
956 Resource for the Routine Dissection of Complex Traits. *Genetics*. 2012;191(3):935-49. doi:  
957 10.1534/genetics.112.138537.
- 958 52. Ioannidis J. Why most discovered true associations are inflated. *Epidemiology* 2008;19(5):640-8  
959 doi: 10.1097/EDE.0b013e31818131e7.
- 960 53. Beavis WD, editor *The power and deceit of QTL experiments: lessons from comparative QTL*  
961 *studies*. Forty-ninth annual corn and sorghum industry research conference; 1994; Washington D.C.
- 962 54. Fuller WA. *Measurement error models*. New York: Wiley; 1987.
- 963 55. Lopez-Gallego C. Genotype-by-Environment Interactions for Seedling Establishment Across  
964 Native and Degraded-Forest Habitats in a Long-Lived Cycad. *The Botanical Review*. 2013;79. doi:  
965 10.1007/s12229-013-9124-9.
- 966 56. Ghosal S, Quilloy FA, Casal C, Septiningsih EM, Mendioro MS, Dixit S. Trait-based mapping to  
967 identify the genetic factors underlying anaerobic germination of rice: Phenotyping, GXE, and QTL  
968 mapping. *BMC Genetics*. 2020;21(1):6. doi: 10.1186/s12863-020-0808-y.
- 969 57. Brown JS, Venable DL. Evolutionary ecology of seed-bank annuals in temporally varying  
970 environments. *The American Naturalist*. 1986;127(1):31-47.
- 971 58. Waser NM, Vickery RK, Price MV. Patterns of seed dispersal and population differentiation in  
972 *Mimulus guttatus*. *Evolution*. 1982; 36:753-61.

- 973 59. Monnahan PJ, Kelly JK. The Genomic Architecture of Flowering Time Varies Across Space and  
974 Time in *Mimulus guttatus*. *Genetics*. 2017;206(3):1621-35. doi: 10.1534/genetics.117.201483.
- 975 60. Fisher R. *Statistical Methods for Research Workers*. . Edinburgh: Oliver and Boyd; 1925.
- 976 61. GRATTEN J, PILKINGTON JG, BROWN EA, CLUTTON-BROCK TH, PEMBERTON JM, SLATE J.  
977 Selection and microevolution of coat pattern are cryptic in a wild population of sheep. *Molecular*  
978 *Ecology*. 2012;21(12):2977-90. doi: 10.1111/j.1365-294X.2012.05536.x.
- 979 62. Jon E. Brommer, Lars Gustafsson, Hannu Pietiäinen, Juha Merilä. Single-Generation Estimates of  
980 Individual Fitness as Proxies for Long-Term Genetic Contribution. *The American Naturalist*.  
981 2004;163(4):505-17. doi: 10.1086/382547. PubMed PMID: 15122499.
- 982 63. Mojica JP, Lee YW, Willis JH, Kelly JK. Spatially and temporally varying selection on  
983 intrapopulation quantitative trait loci for a life history trade-off in *Mimulus guttatus*. *Molecular Ecology*.  
984 2012;21(15):3718-28. doi: 10.1111/j.1365-294X.2012.05662.x. PubMed PMID: WOS:000306478800009.
- 985 64. Byars SG, Huang QQ, Gray L-A, Bakshi A, Ripatti S, Abraham G, et al. Genetic loci associated with  
986 coronary artery disease harbor evidence of selection and antagonistic pleiotropy. *PLOS Genetics*.  
987 2017;13(6):e1006328. doi: 10.1371/journal.pgen.1006328.
- 988 65. Kingsolver JG, Hoekstra HE, Hoekstra JM, Berrigan D, Vignieri SN, Hill CE, et al. The strength of  
989 phenotypic selection in natural populations. *American Naturalist*. 2001;157(3):245-61. PubMed PMID:  
990 ISI:000167301000001.
- 991 66. Wu CA, Lowry DB, Cooley AM, Wright KM, Lee YW, Willis JH. *Mimulus* is an emerging model  
992 system for the integration of ecological and genomic studies *Heredity*. 2008;100:220-30.
- 993 67. Holeski L, Monnahan P, Koseva B, McCool N, Lindroth RL, Kelly JK. A High-Resolution Genetic  
994 Map of Yellow Monkeyflower Identifies Chemical Defense QTLs and Recombination Rate Variation. *G3:  
995 Genes|Genomes|Genetics*. 2014;4(5):813-21. doi: 10.1534/g3.113.010124.
- 996 68. Miller M, Dunham J, Amores A, Cresko W, Johnson E. Rapid and cost-effective polymorphism  
997 identification and genotyping using restriction site associated DNA (RAD) markers. *Genome Research*.  
998 2007;17(2):240-8.
- 999 69. Baird NA, Etter PD, Atwood TS, Currey MC, Shiver AL, Lewis ZA, et al. Rapid SNP Discovery and  
1000 Genetic Mapping Using Sequenced RAD Markers. *PLoS One*. 2008;3:e3376. doi:  
1001 doi.org/10.1371/journal.pone.0003376.
- 1002 70. Phillips PC. From complex traits to complex alleles. *Trends in Genetics*. 1999;15:6-8.
- 1003 71. Natarajan C, Inoguchi N, Weber RE, Fago A, Moriyama H, Storz JF. Epistasis Among Adaptive  
1004 Mutations in Deer Mouse Hemoglobin. *Science*. 2013;340(6138):1324-7. doi: 10.1126/science.1236862.
- 1005 72. Powell MJD. An efficient method for finding the minimum of a function of several variables  
1006 without calculating derivatives. *The Computer Journal*. 1964;7(2):155-62. doi: 10.1093/comjnl/7.2.155.
- 1007 73. Colicchio J, Monnahan PJ, Wessinger CA, Brown K, Kern JR, Kelly JK. Individualized mating  
1008 system estimation using genomic data. *Molecular Ecology Resources*. 2019;n/a(n/a). doi: 10.1111/1755-  
1009 0998.13094.
- 1010 74. Willis JH. Partial self fertilization and inbreeding depression in two populations of *Mimulus*  
1011 *guttatus*. *Heredity*. 1993;71:145-54.

1012
